# Supplementary material for: Quinoxaline based D–A–D molecules: high contrast reversible solid-state mechano- and thermo-responsive fluorescent materials
Source: Royal Society of Chemistry journal article supplement (doi:10.1039/c3tc31179a), 2013-01-01
Supplement: c3tc31179a.pdf [file c3tc31179a.pdf]

# Supplementary Information

## Quinoxaline Based D-A-D Molecules: High Contrast Reversible Solid-state Mechano- and Thermo-Responsive Fluorescent Materials

*Rajeswara Rao M, Chia-Wei Liao, Wei-Lin Su and Shih-Sheng Sun\**

| Table of Content                                                                                          | page no. |
|-----------------------------------------------------------------------------------------------------------|----------|
| 1. MALDI-TOF mass, $^1\text{H}$ and $^{13}\text{C}$ NMR spectra                                           | S2-S5    |
| 2. Molecular stacking structures of <b>AnQ</b> and <b>PyQ</b>                                             | S6- S7   |
| 3. PL spectra of <b>AnQ</b> and <b>PyQ</b> at 77K                                                         | S8       |
| 4. Table S1: PL data of <b>AnQ</b> and <b>PyQ</b> at 77K                                                  | S9       |
| 5. Photograph of <b>AnQ</b> and <b>PyQ</b> at 77K under a portable UV-lamp                                | S9       |
| 6. Plot of Stokes shift ( $\Delta\nu$ ) of <b>AnQ</b> and <b>PyQ</b> verses $\Delta f$ of their solutions | S10      |
| 7. Photographs of <b>AnQ</b> and <b>PyQ</b> in different solvents                                         | S10      |
| 8. Absorption spectra of <b>AnQ</b> and <b>PyQ</b> in various solid phases                                | S11      |
| 9. Absorption spectra of <b>AnQ</b> and <b>PyQ</b> in various THF/water mixtures                          | S12      |
| 10. Cyclic voltammograms of <b>AnQ</b> and <b>PyQ</b>                                                     | S13      |
| 11. TGA thermogram of <b>AnQ</b> and <b>PyQ</b>                                                           | S13      |
| 12. $^1\text{H}$ NMR spectra of <b>AnQ-p</b> , <b>AnQ-h</b> and <b>PyQ-o</b> , <b>PyQ-g</b>               | S14      |
| 14. Crystallographic data of <b>AnQ</b> and <b>PyQ</b>                                                    | S15      |

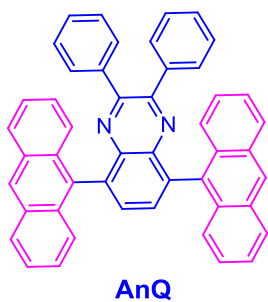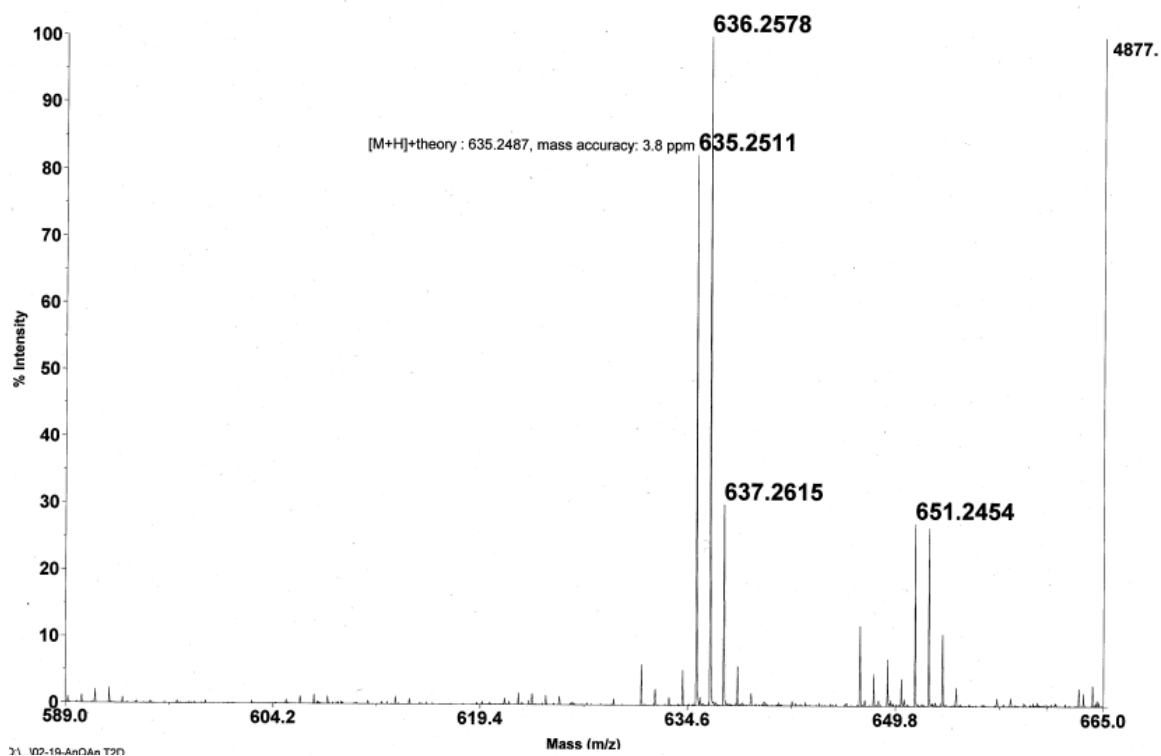

Figure S1. HR-MS mass spectrum of AnQ.

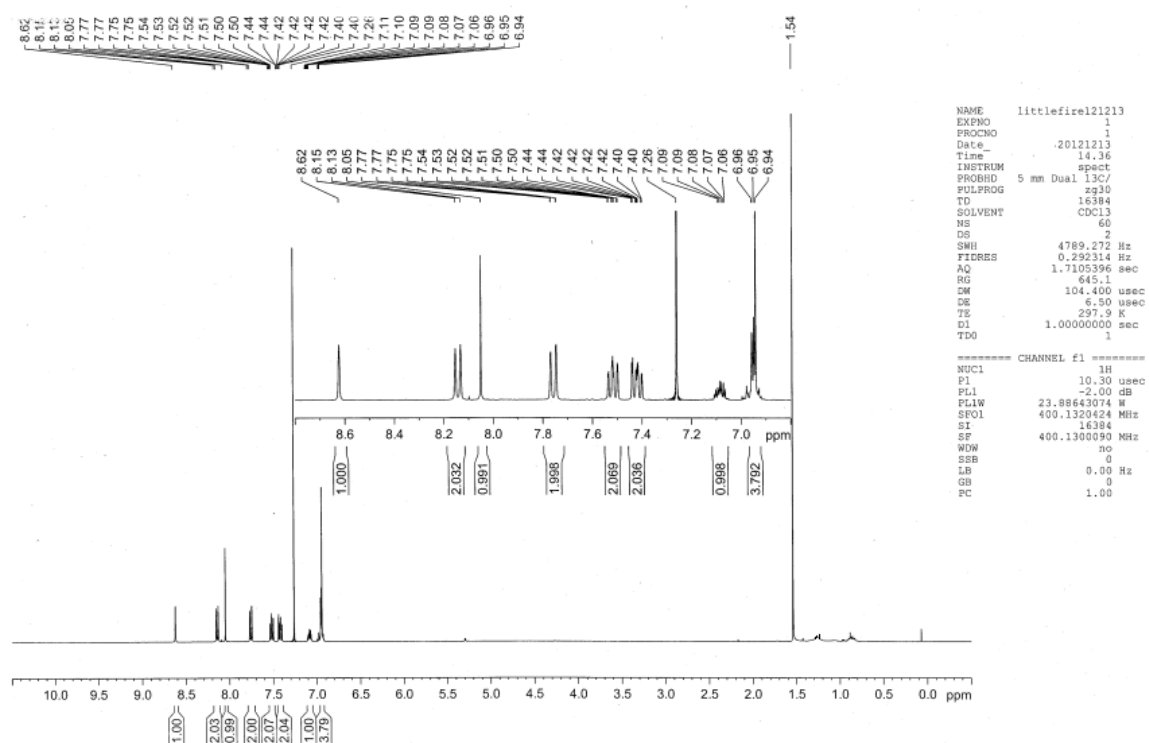

Figure S2.  $^1\text{H}$  NMR spectrum of AnQ in  $\text{CDCl}_3$ .

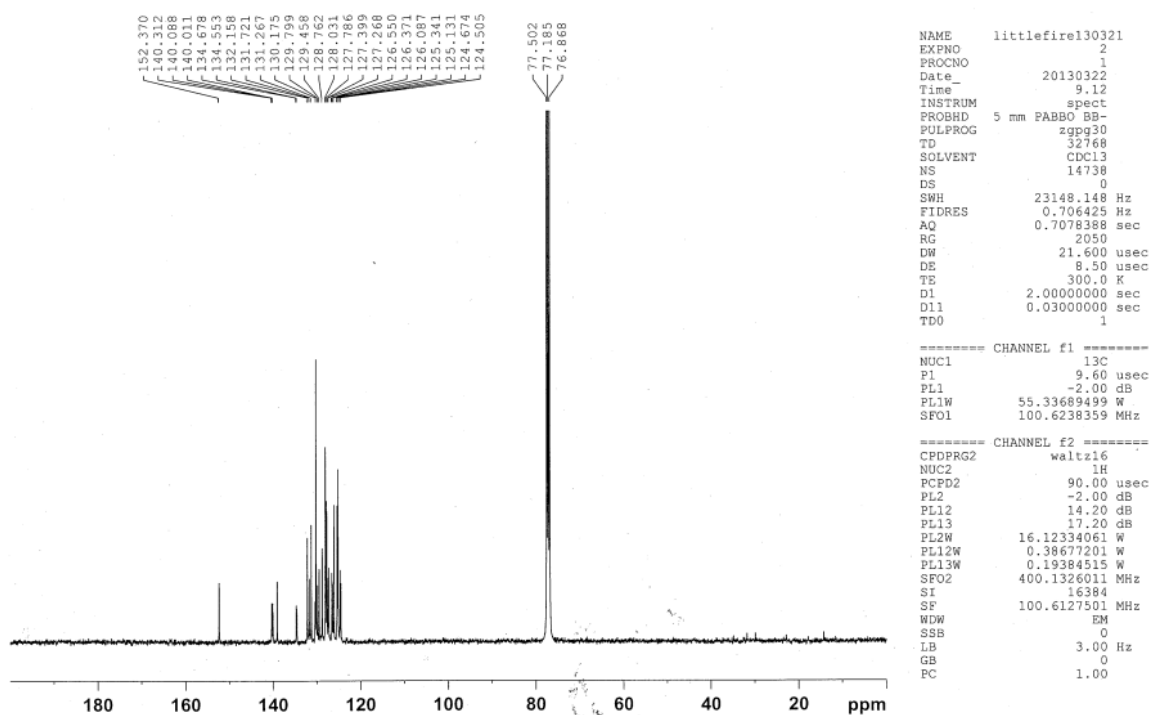

Figure S3.  $^{13}\text{C}$  NMR spectrum of AnQ in  $\text{CDCl}_3$ .

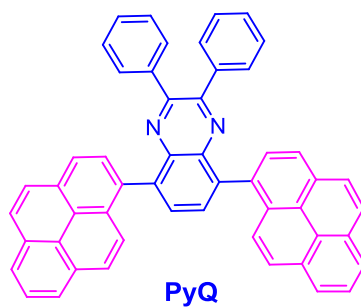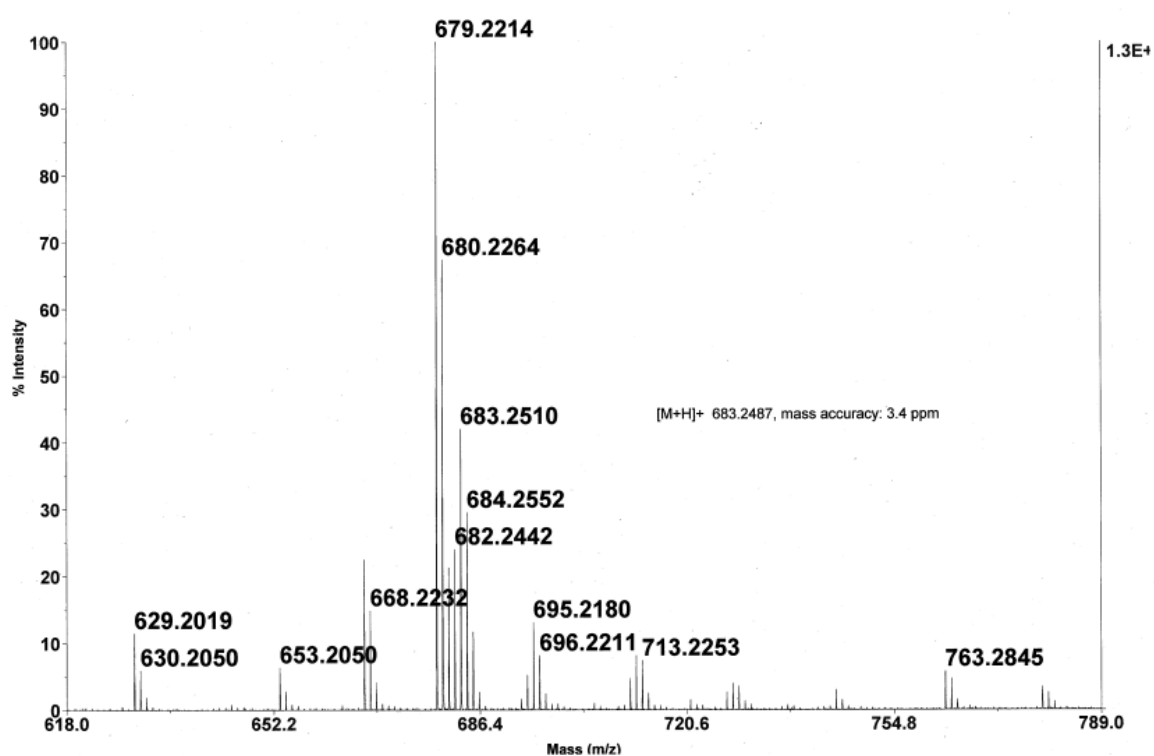

Figure S4. HR-MS mass spectrum of PyQ.

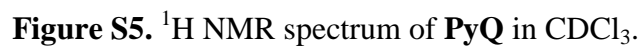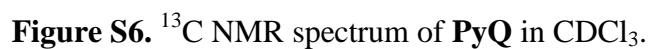

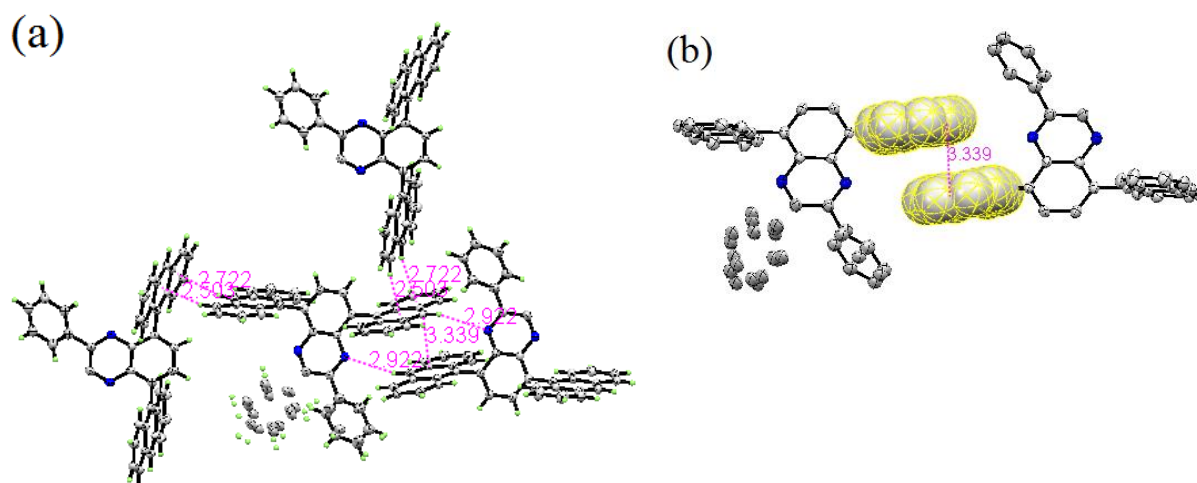

**Figure S7.** (a) Molecular stacking structures of **AnQ** depicting C-H $\cdots$ N and C-H $\cdots$  $\pi$  interactions; (b) Representation of  $\pi$ - $\pi$  interactions between AnQ dimer.

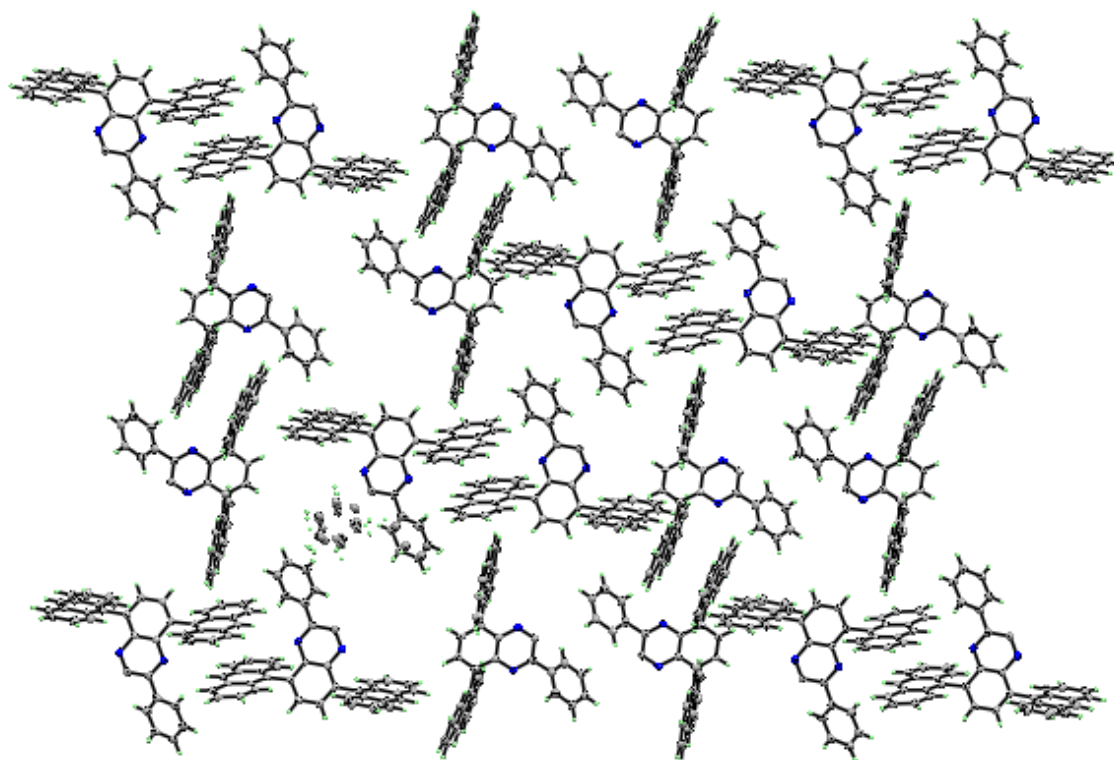

**Figure S8.** Higher order molecular stacking structures of **AnQ**.

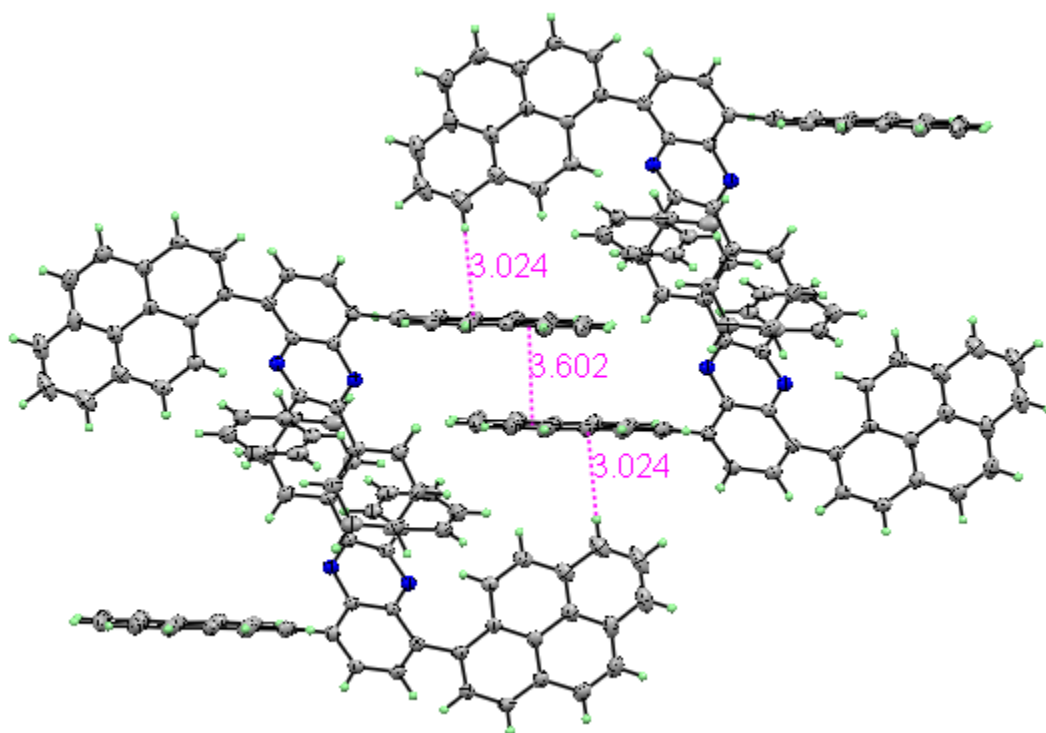

**Figure S9.** Molecular stacking structures of **PyQ** depicting  $\pi$ - $\pi$  and C-H $\cdots$  $\pi$  interactions.

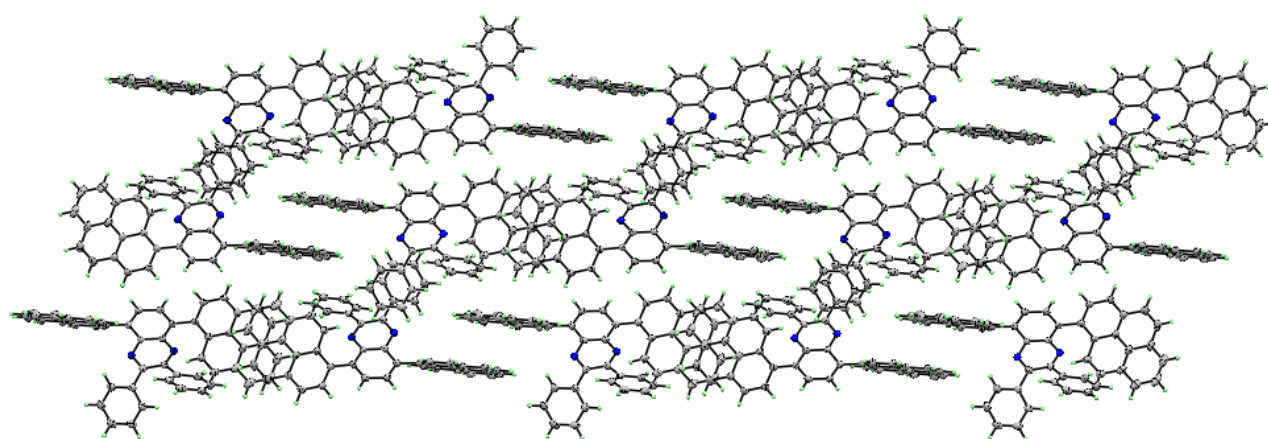

**Figure S10.** Higher order molecular stacking structures of **PyQ**.

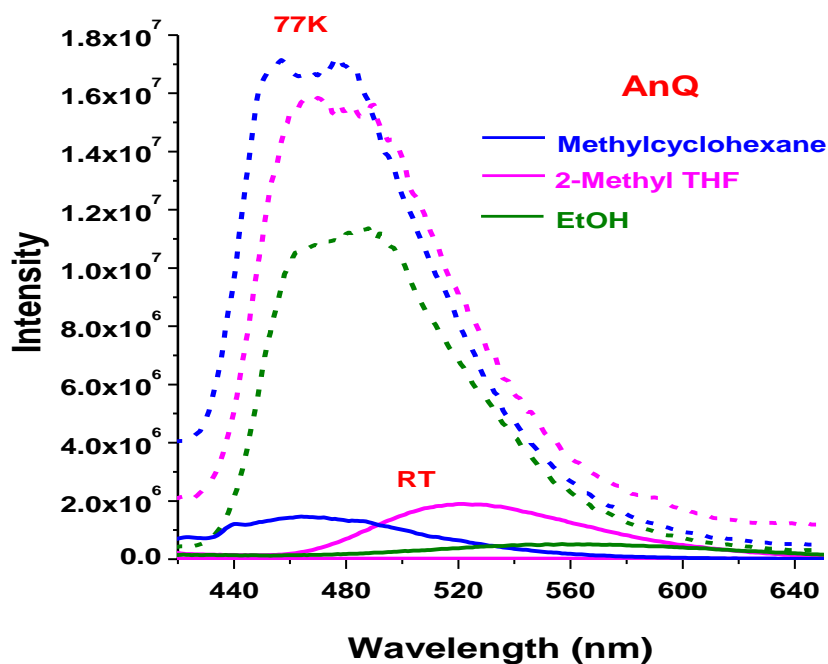

**Figure S11.** PL spectra of AnQ in various solvents at 77 K (····) and RT (—) ( $1 \times 10^{-6}$  M).

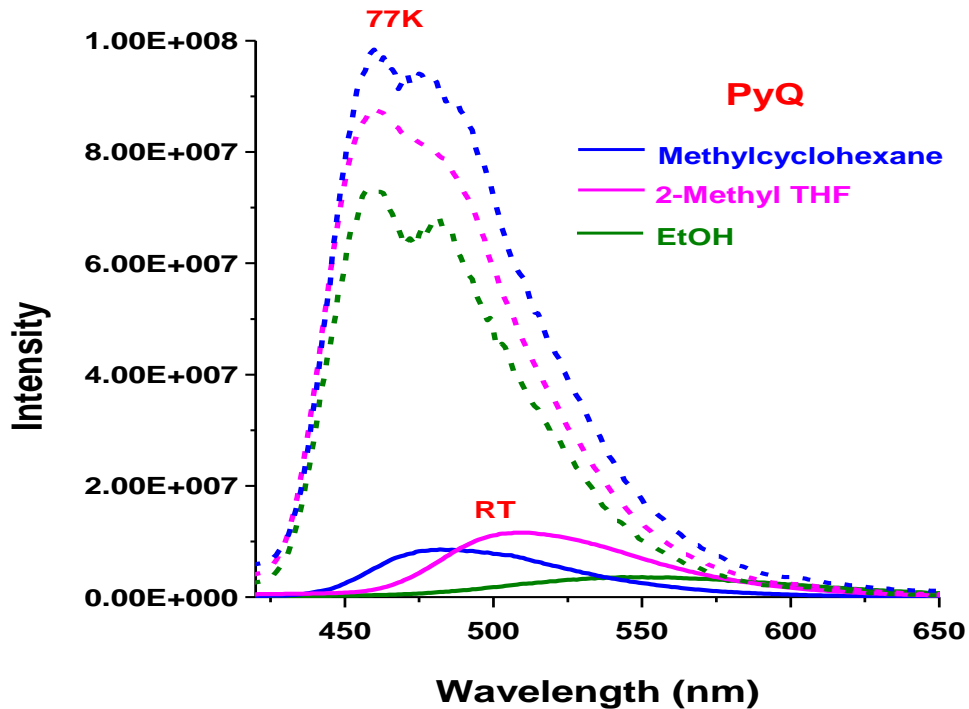

**Figure S12.** PL spectra of PyQ in various solvents at 77 K (····) and RT (—) ( $1 \times 10^{-6}$  M).



**Table S1.** Emission data of **AnQ** and **PyQ** at room temperature and 77 K

|            | Methylcyclohexane |      | 2-MeTHF |      | EtOH |      |
|------------|-------------------|------|---------|------|------|------|
|            | RT                | 77 K | RT      | 77 K | RT   | 77 K |
| <b>AnQ</b> | 469               | 457  | 523     | 468  | 563  | 467  |
| <b>PyQ</b> | 483               | 460  | 512     | 460  | 557  | 460  |

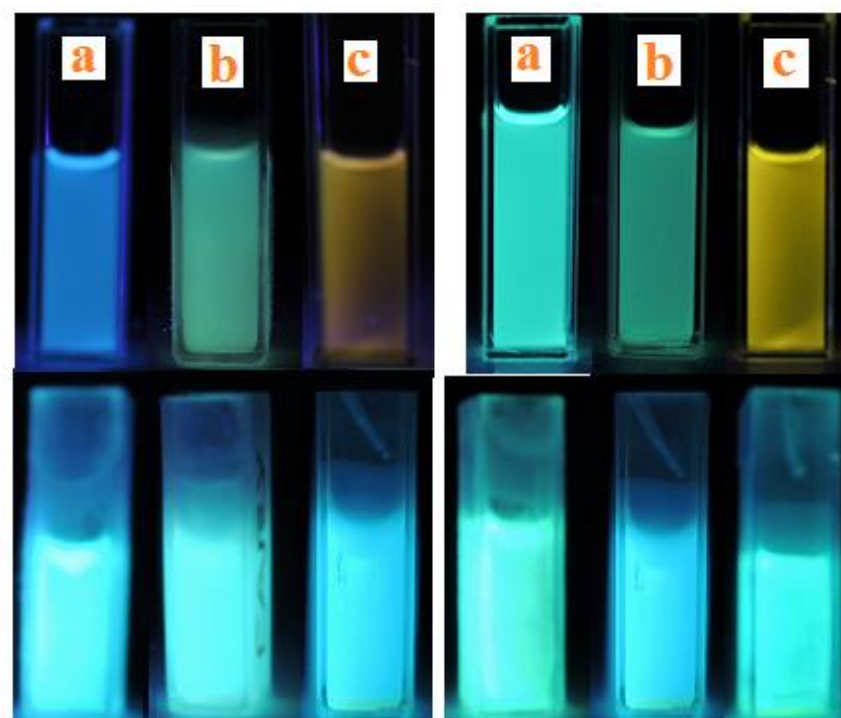

**Figure S13.** Photograph of **AnQ** (left) and **PyQ** (right) in three different solvent at r.t. (above) and 77 K (below) taken under UV-lamp (365 nm) (**a**: methylcyclohexane; **b**: 2-methyl THF; **c**: EtOH).

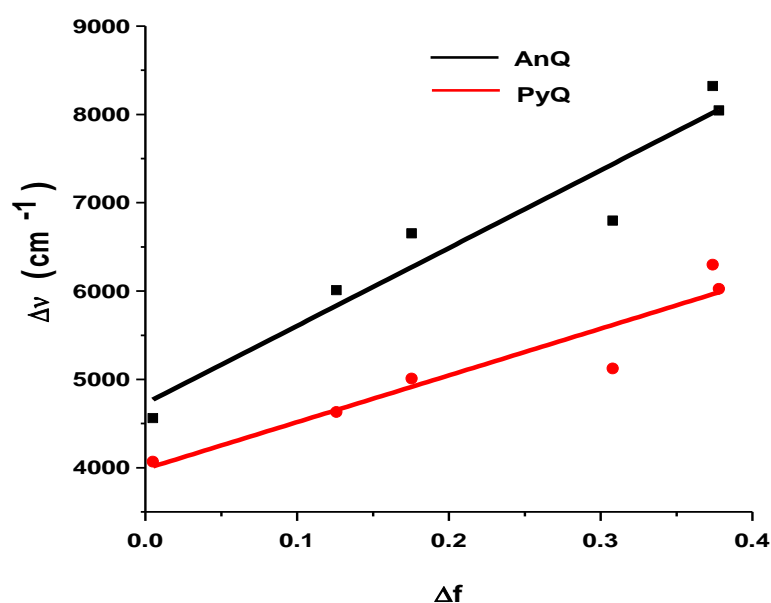

**Figure S14.** Plot of Stokes shift ( $\Delta\nu$ ) of **AnQ** and **PyQ** verses  $\Delta f$  of their solutions.

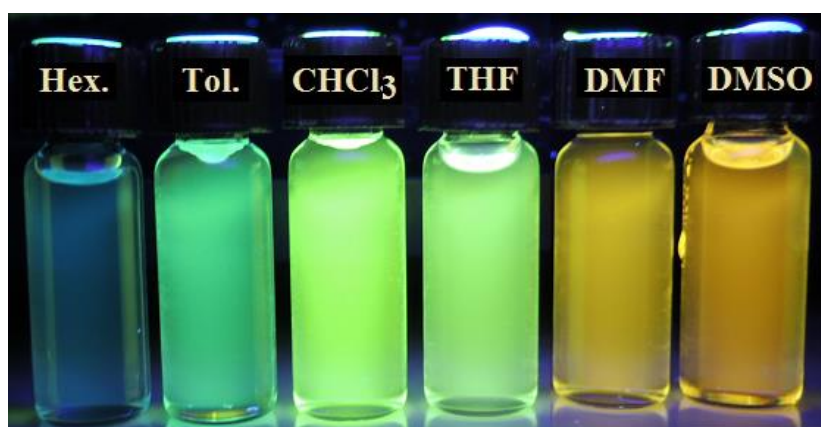

**Figure S15.** Photograph of **AnQ** in different solvents taken under UV-lamp (365 nm).

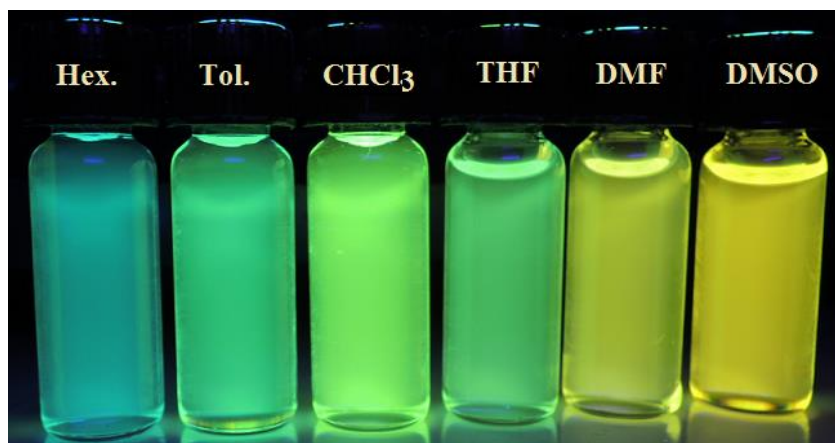

**Figure S16.** Photograph of **PyQ** in different solvents taken under UV-lamp (365 nm).

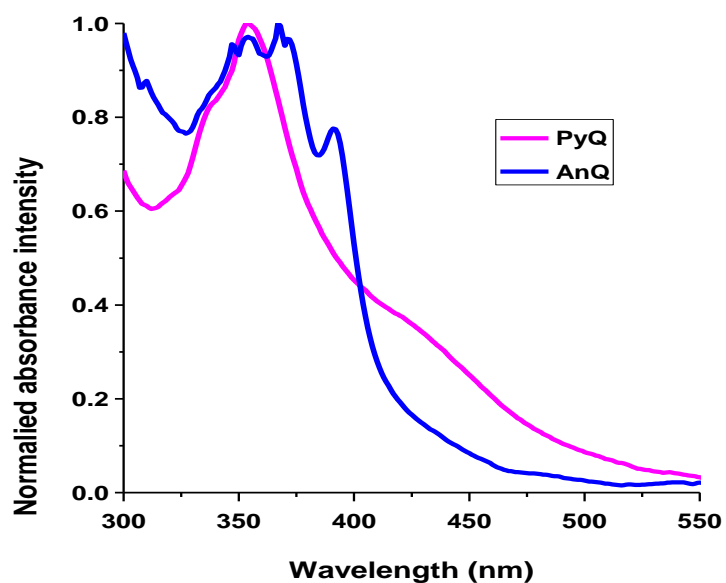

Figure S17. Absorption spectra of AnQ and PyQ in the solid state.

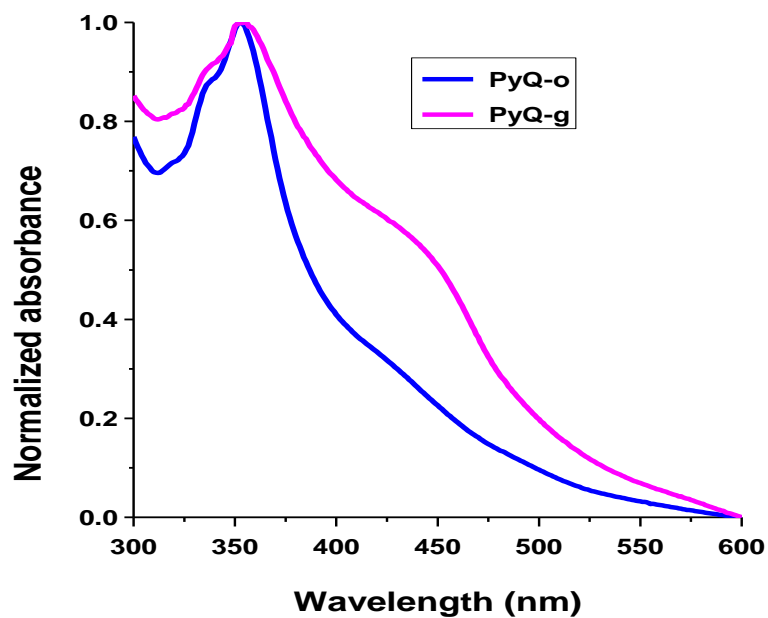

Figure S18. Absorption spectra of PyQ-p and PyQ-g in the solid state.

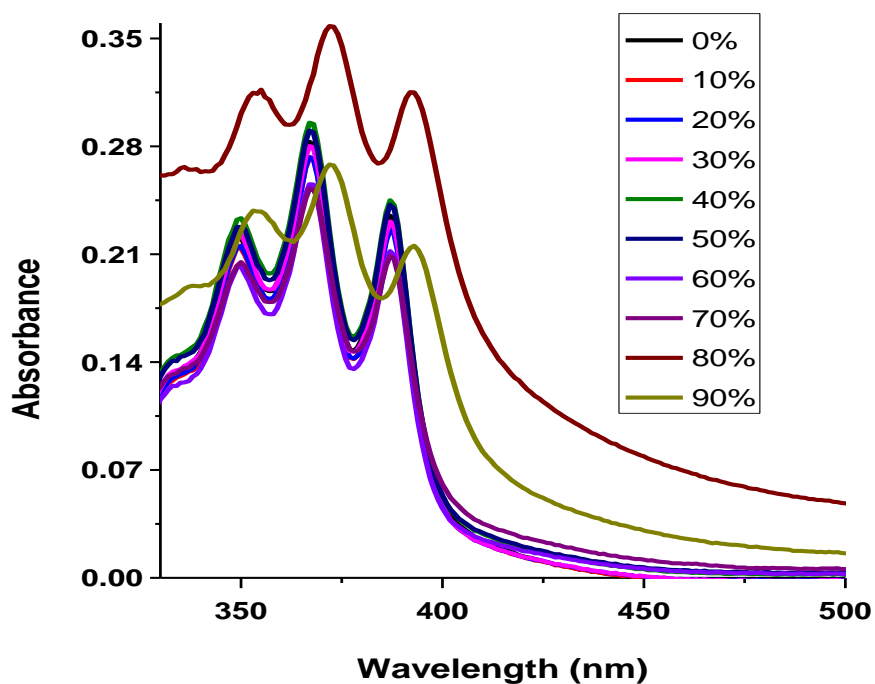

**Figure S19.** Absorption spectra of **AnQ** in various THF/water mixtures respectively.

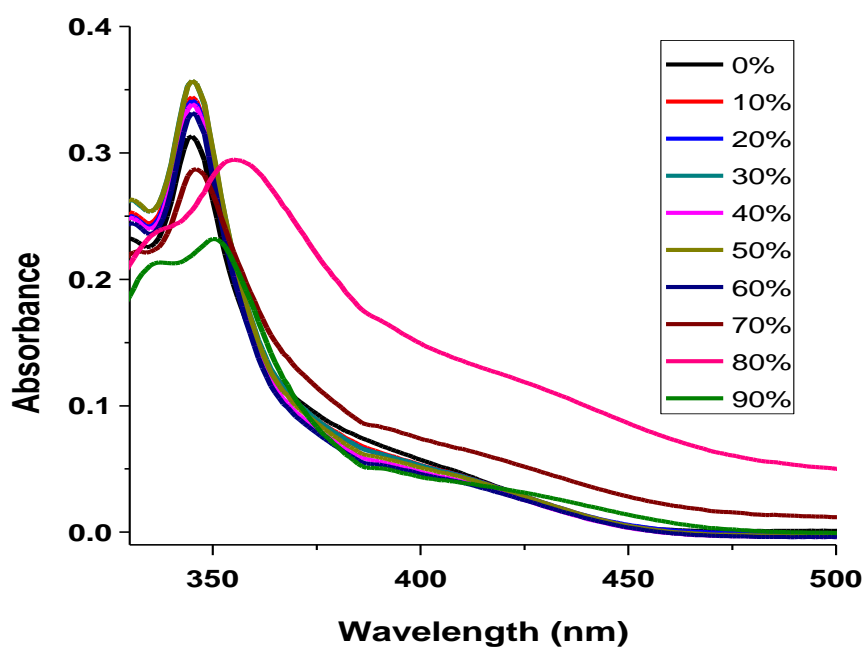

**Figure S20.** Absorption spectra of **PyQ** in various THF/water mixtures respectively.

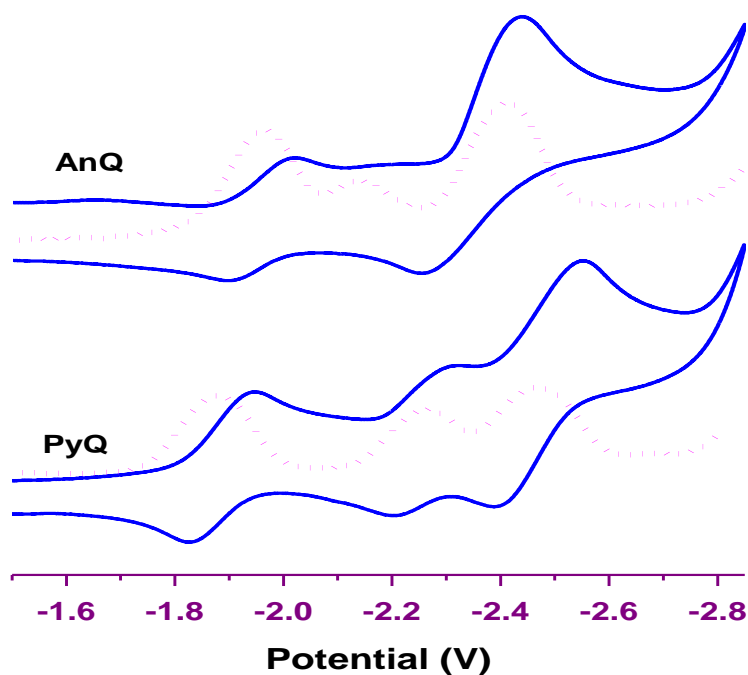

**Figure S21.** Comparison of reduction waves of cyclic voltammograms of **AnQ** and **PyQ** recorded in  $\text{CH}_2\text{Cl}_2$  containing 0.1 M TBAP as supporting electrolyte recorded at  $50 \text{ mV s}^{-1}$  scan speed.

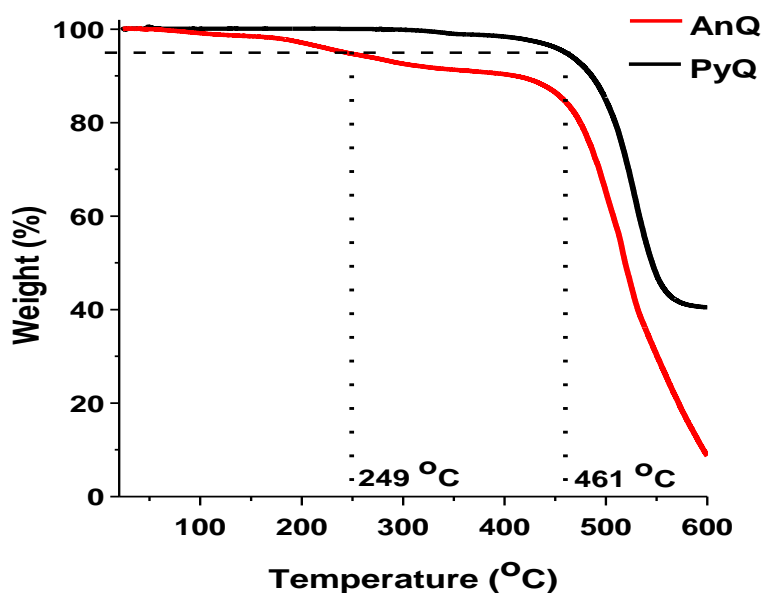

**Figure S22.** TGA thermograms of **AnQ** and **PyQ** recorded under nitrogen at a heating rate of  $10 \text{ }^\circ\text{C min}^{-1}$ .

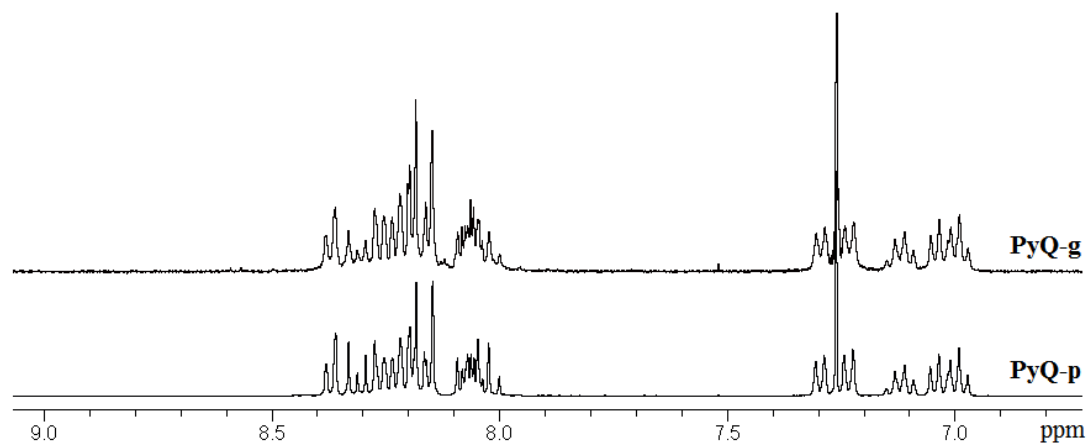

**Figure S23.** <sup>1</sup>H NMR spectra of **PyQ-p** and **PyQ-g** in the selected region recorded in CDCl<sub>3</sub>.

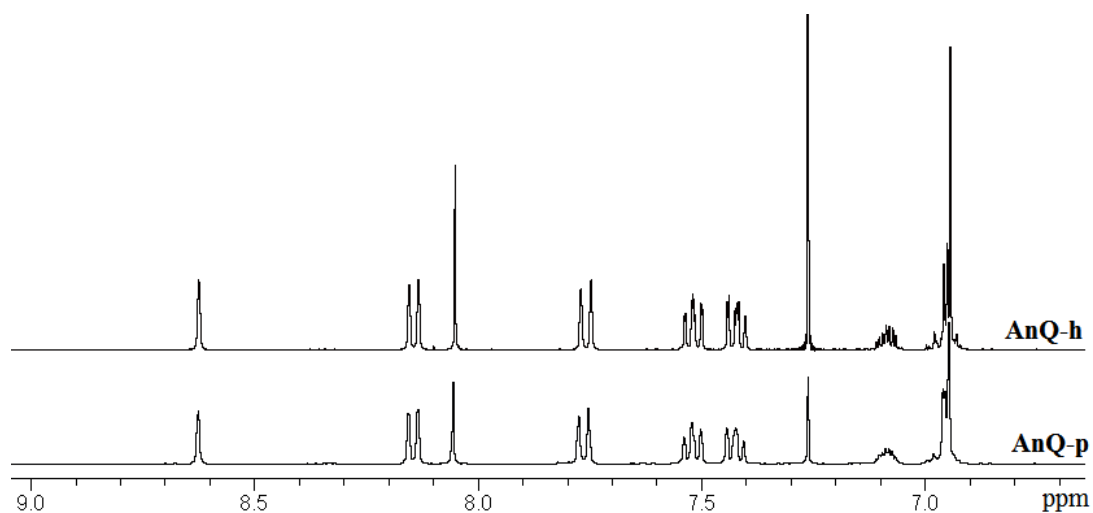

**Figure S24.** <sup>1</sup>H NMR spectra of **AnQ-p** and **AnQ-h** in the selected region recorded in CDCl<sub>3</sub>.

**Table S2.** Crystallographic data and structure refinements of **AnQ** and **PyQ**.

|                                   | <b>AnQ</b>                                     | <b>PyQ</b>                                     |
|-----------------------------------|------------------------------------------------|------------------------------------------------|
| formula                           | C <sub>48</sub> H <sub>30</sub> N <sub>2</sub> | C <sub>52</sub> H <sub>30</sub> N <sub>2</sub> |
| Formula wt                        | 634.74                                         | 682.78                                         |
| T, K                              | 373(10)                                        | 373(10)                                        |
| crystal system                    | monoclinic                                     | monoclinic                                     |
| space group                       | P 2 <sub>1</sub> /n                            | C 2/c                                          |
| a, Å                              | 8.1522(2)                                      | 25.1073(11)                                    |
| b, Å                              | 26.7993(7)                                     | 11.3157(5)                                     |
| c, Å                              | 16.6605(4)                                     | 12.0314(5)                                     |
| α,deg                             | 90                                             | 90                                             |
| β,deg                             | 95.2500(10)                                    | 96.390(2)                                      |
| γ,deg                             | 90                                             | 90                                             |
| V,Å <sup>3</sup>                  | 3624.60(16)                                    | 3397.0(3)                                      |
| Z                                 | 4                                              | 4                                              |
| density, mg/m <sup>3</sup>        | 1.163                                          | 1.335                                          |
| μ/mm <sup>-1</sup>                | 0.067                                          | 0.077                                          |
| θ range, deg                      | 2.46 to 27.21                                  | 2.55 to 27.18                                  |
| no. of reflections measured       | 31159                                          | 14035                                          |
| R(int)                            | 0.0367                                         | 0.0372                                         |
| Goodness-of-fit on F <sup>2</sup> | 1.141                                          | 1.043                                          |
| R1 [I > 2σ(I)]                    | 0.0683                                         | 0.0487                                         |
| wR2 [I > 2σ(I)]                   | 0.1814                                         | 0.1075                                         |
| R1 (all data)                     | 0.1076                                         | 0.0841                                         |
| wR2 (all data)                    | 0.1977                                         | 0.1237                                         |
